# Supplementary material for: Anti-Müllerian hormone and anti-Müllerian hormone type II receptor polymorphisms are associated with follicular phase estradiol levels in normo-ovulatory women
Source: Oxford University Press journal article supplement (doi:10.1093/humrep/dem036), 2007-03-02
Supplement: dem036_Supplementary_Data.zip [file dem036_Supplementary_Data.zip]

Archive with 2 entries (2 files):
- dem036supp2.pdf
- dem036supp1.pdf
