# Supplementary material for: Anti-Müllerian hormone and anti-Müllerian hormone type II receptor polymorphisms are associated with follicular phase estradiol levels in normo-ovulatory women
Source: Oxford University Press journal article supplement (doi:10.1093/humrep/dem036), 2007-03-02
Supplement: dem036_Supplementary_Data.zip [file dem036_Supplementary_Data.zip › dem036supp1.pdf]

Supplemental Table I: Polymorphisms of the anti-Müllerian hormone (AMH) and AMH type II receptor (AMHR2) gene

| Gene        | Basepair change | Amino Acid Change      | Domain                    | Minor Allele Frequency | dbSNP rs nr |
|-------------|-----------------|------------------------|---------------------------|------------------------|-------------|
| AMH         | -649 C>T        |                        | promoter region           | 0.20 <sup>a</sup>      | rs4807216   |
| Chr 19p13.3 | -450 A>G        |                        | promoter region           | 0.07                   | rs3761018   |
|             | -220 A>G        |                        | promoter region           | 0.07                   | rs10406324  |
|             | 78 del AG       |                        | proregion                 | 0.02                   | this study  |
|             | 146 T>G         | Ile <sup>49</sup> Ser  | proregion                 | 0.21 <sup>a</sup>      | rs10407022  |
|             | 252 G>A         | Leu <sup>84</sup>      | proregion                 | 0.06                   | this study  |
|             | 303 G>A         | Gly <sup>101</sup>     | proregion                 | 0.06                   | this study  |
|             | 1020 C>T        | Thr <sup>143</sup> Ile | proregion                 | 0.03                   | this study  |
|             | 1138 G>A        | Pro <sup>182</sup>     | proregion                 | 0.03                   | rs17854573  |
|             | 1806 C>G        | Asp <sup>288</sup> Glu | mature region             | 0.01                   | this study  |
|             | 2148 G>A        | Pro <sup>402</sup>     | mature region             | 0.01                   | this study  |
|             | 2181 A>T        | Gly <sup>413</sup>     | mature region             | 0.05                   | rs7252789   |
|             | 2419 A>T        | Gly <sup>493</sup> Arg | mature region             | 0.01                   | this study  |
|             | 2486 C>T        | Ala <sup>515</sup> Val | mature region             | 0.03                   | rs10417628  |
|             | 2498 C>T        | Ala <sup>519</sup> Val | mature region             | 0.02                   | this study  |
| AMHR2       | 877 G>A         | Gly <sup>112</sup> Asp | ligand binding domain     | 0.01                   | this study  |
| Chr 12q13   | 1749 C>T        |                        | intron 5/ exon 6 boundary | 0.19 <sup>a</sup>      | rs2071558   |
|             | 4952 G>A        |                        | intron 6/ exon 7 boundary | 0.19 <sup>a</sup>      | rs3741664   |
|             | 5589 G>A        | Ser <sup>346</sup>     | kinase domain             | 0.01                   | rs784890    |

Polymorphisms identified in the AMH and AMHR2 gene by sequencing 45 Caucasian blood-bank donor samples. Nucleotides are numbered relative to the translation start

site. Previously identified single nucleotide polymorphisms (SNPs) are listed with their corresponding database SNP rs number.

<sup>a</sup> Included in association study.
