# Supplementary material for: Anti-Müllerian hormone and anti-Müllerian hormone type II receptor polymorphisms are associated with follicular phase estradiol levels in normo-ovulatory women
Source: Oxford University Press journal article supplement (doi:10.1093/humrep/dem036), 2007-03-02
Supplement: dem036_Supplementary_Data.zip [file dem036_Supplementary_Data.zip › dem036supp2.pdf]

Supplemental Table IIA: Genotype distribution of the AMH Ile<sup>49</sup>Ser polymorphism over the FSH receptor (FSHR) Asn<sup>680</sup>Ser polymorphism.

|                                | Dutch cohort              |         |         | German cohort             |         |         |
|--------------------------------|---------------------------|---------|---------|---------------------------|---------|---------|
|                                | AMH Ile <sup>49</sup> Ser |         |         | AMH Ile <sup>49</sup> Ser |         |         |
| FSHR<br>Asn <sup>680</sup> Ser | Ile/Ile                   | Ile/Ser | Ser/Ser | Ile/Ile                   | Ile/Ser | Ser/Ser |
| Asn/Asn                        | 11                        | 3       |         | 8                         | 4       |         |
| Asn/Ser                        | 10                        | 4       |         |                           |         |         |
| Ser/Ser                        | 3                         | 1       |         | 7                         |         | 2       |

Genotype distribution of AMH Ile<sup>49</sup>Ser polymorphism in the Dutch cohort is random (P=0.91) whereas genotype distribution in the German cohort is not random (P=0.056) compared to FSHR Asn<sup>680</sup>Ser genotypes. Values given are the number of subjects.

Supplemental Table IIB: Genotype distribution of the AMHR2 –482 A>G polymorphism over the FSHR Asn<sup>680</sup>Ser polymorphism.

|                                | Dutch cohort   |     |     | German cohort  |     |     |
|--------------------------------|----------------|-----|-----|----------------|-----|-----|
|                                | AMHR2 –482 A>G |     |     | AMHR2 –482 A>G |     |     |
| FSHR<br>Asn <sup>680</sup> Ser | A/A            | A/G | G/G | A/A            | A/G | G/G |
| Asn/Asn                        | 7              | 7   |     | 8              | 3   | 1   |
| Asn/Ser                        | 9              | 5   |     |                |     |     |
| Ser/Ser                        | 4              |     |     | 7              | 2   |     |

Genotype distribution of AMHR2 –482 A>G polymorphism in the Dutch cohort (P=0.19) and German cohort is random (P=0.62) compared to FSHR Asn<sup>680</sup>Ser genotypes. Values given are the number of subjects.
